# Supplementary material for: Genome-Wide Analysis of WOX Multigene Family in Sunflower (Helianthus annuus L.)
Source: MDPI journal article supplement (doi:10.3390/ijms24043352), 2023-02-08
Supplement: s1 [file s1]

# Genome-Wide Analysis of WOX Multigene Family in Sunflower (*Helianthus annuus* L.)

Ettore Riccucci <sup>1,2,†</sup>, Cosimo Vanni <sup>1</sup>, Alberto Vangelisti <sup>1,†</sup>, Marco Fambrini <sup>1</sup>, Tommaso Giordani <sup>1</sup>, Andrea Cavallini <sup>1</sup>, Flavia Mascagni <sup>1,\*</sup> and Claudio Pugliesi <sup>1</sup>

<sup>1</sup> Department of Agriculture Food and Environment, University of Pisa, Via del Borghetto 80, 56124 Pisa, Italy

<sup>2</sup> Scuola Superiore Sant'Anna, Piazza Martiri della Libertà 33, 56127 Pisa, Italy

\* Correspondence: [flavia.mascagni@unipi.it](mailto:flavia.mascagni@unipi.it)

† These authors contributed equally to this work.

| <i>Glycine max</i> |         |                 | <i>Arabidopsis thaliana</i> |         |             | <i>Oryza sativa</i> |         |                  | <i>Populus trichocarpa</i> |         |                      |
|--------------------|---------|-----------------|-----------------------------|---------|-------------|---------------------|---------|------------------|----------------------------|---------|----------------------|
| 1                  | GmWOX01 | Glyma01g37190.2 | 1                           | AtWOX14 | AT1G20700.1 | 1                   | OsWOX01 | LOC_Os01g47710.1 | 1                          | PtWOX1  | Potri.014G025300.1.p |
| 2                  | GmWOX02 | Glyma02g10410.1 | 2                           | AtWOX10 | AT1G20710.1 | 2                   | OsWOX02 | LOC_Os01g60270.1 | 2                          | PtWOX2  | Potri.002G124100.1.p |
| 3                  | GmWOX03 | Glyma02g42200.1 | 3                           | AtWOX04 | AT1G46480.1 | 3                   | OsWOX03 | LOC_Os01g62310.1 | 3                          | PtWOX3  | Potri.012G047700.1.p |
| 4                  | GmWOX04 | Glyma03g01000.1 | 4                           | AtWOX06 | AT2G01500.1 | 4                   | OsWOX04 | LOC_Os01g63510.1 | 4                          | PtWOX4  | Potri.015G039100.1.p |
| 5                  | GmWOX05 | Glyma04g01830.1 | 5                           | AtWUS   | AT2G17950.1 | 5                   | OsWOX05 | LOC_Os03g20910.1 | 5                          | PtWOX5  | Potri.010G192100.1.p |
| 6                  | GmWOX06 | Glyma04g04310.1 | 6                           | AtWOX03 | AT2G28610.1 | 6                   | OsWOX06 | LOC_Os04g55590.1 | 6                          | PtWOX6  | Potri.011G061400.1.p |
| 7                  | GmWOX07 | Glyma05g33850.1 | 7                           | AtWOX09 | AT2G33880.1 | 7                   | OsWOX07 | LOC_Os04g56780.1 | 7                          | PtWOX7  | Potri.005G114700.1.p |
| 8                  | GmWOX08 | Glyma06g01940.1 | 8                           | AtWOX11 | AT3G03660.1 | 8                   | OsWOX08 | LOC_Os05g02730.1 | 8                          | PtWOX8  | Potri.007G012100.1.p |
| 9                  | GmWOX09 | Glyma06g04470.1 | 9                           | AtWOX05 | AT3G11260.1 | 9                   | OsWOX09 | LOC_Os05g48990.1 | 9                          | PtWOX9  | Potri.004G051600.4.p |
| 10                 | GmWOX10 | Glyma07g11372.1 | 10                          | AtWOX01 | AT3G18010.1 | 10                  | OsWOX10 | LOC_Os07g34880.1 | 10                         | PtWOX10 | Potri.009G029200.1.p |
| 11                 | GmWOX11 | Glyma07g15710.2 | 11                          | AtWOX13 | AT4G35550.1 | 11                  | OsWOX11 | LOC_Os07g48560.1 | 11                         | PtWOX11 | Potri.001G237900.1.p |
| 12                 | GmWOX12 | Glyma07g32430.1 | 12                          | AtWOX07 | AT5G05770.1 | 12                  | OsWOX12 | LOC_Os08g14400.1 | 12                         | PtWOX12 | Potri.010G111400.1.p |
| 13                 | GmWOX13 | Glyma07g34425.1 | 13                          | AtWOX12 | AT5G17810.1 | 13                  | OsWOX13 | LOC_Os11g01130.1 | 13                         | PtWOX13 | Potri.013G066900.2.p |
| 14                 | GmWOX14 | Glyma08g05831.1 | 14                          | AtWOX08 | AT5G45980.1 | 14                  | OsWOX14 | LOC_Os12g01120.1 | 14                         | PtWOX14 | Potri.019G040800.2.p |
| 15                 | GmWOX15 | Glyma09g30831.1 | 15                          | AtWOX15 | AT5G46010.1 |                     |         |                  | 15                         | PtWOX15 | Potri.008G065400.1.p |
| 16                 | GmWOX16 | Glyma10g08030.1 | 16                          | AtWOX02 | AT5G59340.1 |                     |         |                  | 16                         | PtWOX16 | Potri.005G101800.1.p |
| 17                 | GmWOX17 | Glyma10g43580.2 |                             |         |             |                     |         |                  | 17                         | PtWOX17 | Potri.005G252800.1.p |
| 18                 | GmWOX18 | Glyma11g08091.1 |                             |         |             |                     |         |                  | 18                         | PtWOX18 | Potri.002G008800.1.p |
| 19                 | GmWOX19 | Glyma11g14940.2 |                             |         |             |                     |         |                  |                            |         |                      |
| 20                 | GmWOX20 | Glyma11g34990.1 |                             |         |             |                     |         |                  |                            |         |                      |
| 21                 | GmWOX21 | Glyma12g06895.1 |                             |         |             |                     |         |                  |                            |         |                      |
| 22                 | GmWOX22 | Glyma13g21860.2 |                             |         |             |                     |         |                  |                            |         |                      |
| 23                 | GmWOX23 | Glyma13g24150.1 |                             |         |             |                     |         |                  |                            |         |                      |
| 24                 | GmWOX24 | Glyma13g41000.1 |                             |         |             |                     |         |                  |                            |         |                      |
| 25                 | GmWOX25 | Glyma14g09310.1 |                             |         |             |                     |         |                  |                            |         |                      |
| 26                 | GmWOX26 | Glyma15g04460.1 |                             |         |             |                     |         |                  |                            |         |                      |
| 27                 | GmWOX27 | Glyma17g35880.2 |                             |         |             |                     |         |                  |                            |         |                      |
| 28                 | GmWOX28 | Glyma18g03350.1 |                             |         |             |                     |         |                  |                            |         |                      |
| 29                 | GmWOX29 | Glyma18g39520.2 |                             |         |             |                     |         |                  |                            |         |                      |
| 30                 | GmWOX30 | Glyma18g52491.1 |                             |         |             |                     |         |                  |                            |         |                      |
| 31                 | GmWOX31 | Glyma19g29660.2 |                             |         |             |                     |         |                  |                            |         |                      |
| 32                 | GmWOX32 | Glyma20g02161.1 |                             |         |             |                     |         |                  |                            |         |                      |

|    |         |                 |  |  |  |  |  |  |  |
|----|---------|-----------------|--|--|--|--|--|--|--|
| 33 | GmWOX33 | Glyma20g23220.2 |  |  |  |  |  |  |  |
|----|---------|-----------------|--|--|--|--|--|--|--|

**Table S1.** Accession numbers of WOX genes from different species (i.e., *Glycine max*, *Arabidopsis thaliana*, *Oryza sativa*, and *Populus trichocarpa*) whose amino acid sequences were used for the Neighbor-Joining phylogenetic tree.

| Gene Name                    | NCBI gene ID | NCBI protein ID | NCBI mRNA ID   | Primer name | Primer sequence (5'-3')  | bp | Tm   | Amp |
|------------------------------|--------------|-----------------|----------------|-------------|--------------------------|----|------|-----|
| <i>Actin-7</i> (chr 15)      | LOC110909803 | XP_022010246.1  | XM_022154554.2 | AF          | GTATTGTCAGCAACTGGGATGA   | 22 | 58,4 | 108 |
|                              |              |                 |                | AR          | ATGGTGCCTCAGTGAGAAGAAC   | 22 | 60,3 |     |
| <i>Alpha-Tubulin</i> (chr 5) | LOC110941095 | XP_022038405.2  | XM_022182713.2 | TUBF        | TCTTCTGTTGGAGCGTCTGTCTG  | 22 | 62,1 | 124 |
|                              |              |                 |                | TUBR        | GTGGGTGGAAAGCACACTGTTG   | 22 | 62,1 |     |
| <i>HaWOX1</i> (chr 14)       | LOC110905747 | XP_022006965.1  | XM_022151273.2 | F1_1        | TCATCACATTGGGGTTGGTTC    | 21 | 57,9 | 115 |
|                              |              |                 |                | R1_1        | CTCTCCCGGTGGTGATATTGA    | 20 | 57,3 |     |
| <i>HaWOX2</i> (chr 16)       | LOC110918187 | XP_022018228.1  | XM_022162536.2 | F2_2        | GGTGGTTCTTCATCTTCACAAG   | 22 | 58,4 | 109 |
|                              |              |                 |                | R2_2        | CTGTGTACTCTCCCGGTGAT     | 20 | 59,3 |     |
| <i>HaWOX3</i> (chr 12)       | LOC110895832 | XP_021998889.1  | XM_022143197.2 | F1_3        | TGACGTGGACTCTTATGAAACCC  | 23 | 60,6 | 139 |
|                              |              |                 |                | R1_3        | GGGTAGAAACTCGATGAACTGTC  | 23 | 60,6 |     |
| <i>HaWOX4</i> (chr 16)       | LOC110917230 | XP_022017513.1  | XM_022161821.2 | F1_4        | CCCATCCTCCACCATGATAAACT  | 23 | 60,6 | 97  |
|                              |              |                 |                | R1_4        | GCACTCAAATGACCAACTTCTAC  | 23 | 58,9 |     |
| <i>HaWOX5</i> (chr 1)        | LOC110943319 | XP_022040761.1  | XM_022185069.2 | F2_5        | CCACAACGTGACATAGGGTTCTA  | 23 | 59,8 | 158 |
|                              |              |                 |                | R2_5        | CTTGGTTCGGGTGGTGGTC      | 19 | 58,4 |     |
| <i>HaWOX6</i> (chr 14)       | LOC110906266 | XP_022007144.1  | XM_022151452.2 | F1_6        | CAAACCTAGCCGCAGTACTTCTA  | 23 | 60,6 | 169 |
|                              |              |                 |                | R1_6        | CTTACCATAAAAAGCTCAACTGGG | 23 | 58,9 |     |
| <i>HaWOX7</i> (chr 9)        | LOC110879415 | XP_021983563.1  | XM_022127871.2 | F5_7        | TGGAGATGTTATATAGAGGTGGA  | 23 | 57,1 | 157 |
|                              |              |                 |                | R5_7        | TTGCCATACTTGCTTAGTTGAGA  | 23 | 57,1 |     |
| <i>HaWOX8</i> (chr 5)        | LOC110942716 | XP_022040174.1  | XM_022184482.1 | F1_8        | GCCGTTTGTTTCATATACCTCC   | 21 | 57,9 | 130 |
|                              |              |                 |                | R1_8        | GTCGGTTGAGAGAGCTGCT      | 18 | 58,8 |     |
| <i>HaWOX9</i> (chr 4)        | LOC110934532 | XP_022033204.1  | XM_022177512.2 | F1_9        | CCTCTTCATCAGGTTGCTGG     | 20 | 59,3 | 103 |
|                              |              |                 |                | R1_9        | ATGTGAGTTTGACAGGTGCTATC  | 22 | 58,4 |     |
| <i>HaWOX10</i> (chr 8)       | LOC110871325 | XP_021975839.1  | XM_022120147.2 | F2_10       | CAACTCACCTTGTTATCATCCCT  | 23 | 58,9 | 145 |
|                              |              |                 |                | R2_10       | GAATGAGCAATCACACATGACCT  | 23 | 58,9 |     |
| <i>HaWOX11</i> (chr 1)       | LOC110905286 | XP_022006821.1  | XM_022151129.2 | F1_11       | GCCCTGCAAACTCATGTGTGA    | 21 | 59,8 | 127 |
|                              |              |                 |                | R1_11       | ATCTGTGGTGGTGAGTGGGA     | 20 | 59,3 |     |
| <i>HaWOX12</i> (chr 16)      | LOC110917354 | XP_022017615.1  | XM_022161923.2 | F2_12       | AGTGTTTATCAACGATGTGCCG   | 22 | 58,4 | 105 |
|                              |              |                 |                | R2_12       | ACAGTCTGCCC GGATGAATC    | 20 | 59,3 |     |

|                               |              |                |                |       |                         |    |      |     |
|-------------------------------|--------------|----------------|----------------|-------|-------------------------|----|------|-----|
| <i>HaWOX13</i> (chr 11)       | LOC110891845 | XP_021995064.1 | XM_022139372.2 | F1_13 | CACCTCACCGAGTTCTCTC     | 19 | 58,8 | 113 |
|                               |              |                |                | R1_13 | AACCCTTCTGTAAACCCACACA  | 21 | 57,9 |     |
| <i>HaWOX14</i> (chr 17)       | LOC110922699 | XP_022022624.1 | XM_022166932.2 | F1_14 | CACAAGGATTTTGCTTTCCCGAG | 23 | 60,6 | 105 |
|                               |              |                |                | R1_14 | CAGTTGGCAGCATCCCACAT    | 20 | 59,3 |     |
| <i>HaWOX15</i> iso_1 (chr 16) | LOC110915545 | XP_022015954.1 | XM_022160262.2 | F1_15 | GAATGCGGGTCAGATTTCGTA   | 21 | 57,9 | 83  |
|                               |              |                |                | R1_15 | CGGAGCCTCAATCTTTCCAAT   | 21 | 57,9 |     |
| <i>HaWOX17</i> iso_1 (chr 15) | LOC110911924 | XP_022012271.1 | XM_022156579.2 | F1_16 | GAGTCACCCAAACCTCAGCA    | 20 | 59,3 | 82  |
|                               |              |                |                | R1_16 | CGACAGAACACGCATTGGA     | 20 | 57,3 |     |

**Table S2.** List of *WUSCHEL HOMEBOX-like* (*HaWOX*) analyzed genes from sunflower (*Helianthus annuus* L.) and gene-specific primers used for quantitative Real Time PCR (qRT-PCR). In the first column, in brackets, are indicated the linkage groups (chr) of sunflower genome [44]. Information of publicly available repository of NCBI genes, transcripts and proteins are reported in the table. bp= base pair; Tm= temperature melting; Amp= amplified nucleotides.

| HaWOX   | NCBI protein id | NCBI locus id | Chromosome number | Locus Start | Locus Stop | Strand | Length | Number of exons |
|---------|-----------------|---------------|-------------------|-------------|------------|--------|--------|-----------------|
| HaWOX1  | XP_022006965.1  | LOC110905747  | chr 14            | 111147922   | 111149801  | +      | 293    | 3               |
| HaWOX2  | XP_022018228.1  | LOC110918187  | chr 16            | 200545038   | 200546829  | +      | 343    | 3               |
| HaWOX3  | XP_021998889.1  | LOC110895832  | chr 12            | 98197915    | 98202980   | +      | 347    | 4               |
| HaWOX4  | XP_022017513.1  | LOC110917230  | chr 16            | 36270578    | 36272102   | +      | 242    | 3               |
| HaWOX5  | XP_022040761.1  | LOC110943319  | chr 1             | 67922367    | 67928543   | -      | 241    | 2               |
| HaWOX6  | XP_022007144.1  | LOC110906266  | chr 14            | 167839771   | 167840766  | -      | 210    | 2               |
| HaWOX7  | XP_021983563.1  | LOC110879415  | chr 9             | 165599317   | 165600805  | +      | 239    | 3               |
| HaWOX8  | XP_022040174.1  | LOC110942716  | chr 5             | 12617328    | 12620462   | -      | 254    | 3               |
| HaWOX9  | XP_022033204.1  | LOC110934532  | chr 4             | 111297211   | 111299307  | -      | 186    | 2               |
| HaWOX10 | XP_021975839.1  | LOC110871325  | chr 8             | 87986765    | 87988719   | +      | 214    | 2               |
| HaWOX11 | XP_022006821.1  | LOC110905286  | chr 1             | 66052674    | 66054993   | +      | 182    | 2               |
| HaWOX12 | XP_022017615.1  | LOC110917354  | chr 16            | 146057100   | 146060383  | -      | 389    | 5               |
| HaWOX13 | XP_021995064.1  | LOC110891845  | chr 11            | 125959177   | 125962848  | -      | 389    | 5               |
| HaWOX14 | XP_022022624.1  | LOC110922699  | chr 17            | 134462267   | 134464881  | -      | 389    | 4               |
| HaWOX15 | XP_022015954.1  | LOC110915545  | chr 16            | 203021901   | 203025077  | +      | 247    | 4               |
| HaWOX16 | XP_022015955.1  | LOC110915545  | chr 16            | 203021901   | 203025077  | +      | 215    | 4               |
| HaWOX17 | XP_022012271.1  | LOC110911924  | chr 15            | 82272148    | 82275053   | +      | 249    | 3               |
| HaWOX18 | XP_022012272.1  | LOC110911924  | chr 15            | 82272148    | 82275053   | +      | 243    | 3               |

**Table S3.** List of WOX proteins in *Helianthus annuus* genome.

| Clade        | HaWOX   | Database | Signature accession | Signature description      | Signature start location | Signature stop location |
|--------------|---------|----------|---------------------|----------------------------|--------------------------|-------------------------|
| WUS          | HaWOX1  | PANTHER  | PTHR45940:SF2       | PROTEIN WUSCHEL            | 4                        | 291                     |
|              | HaWOX1  | Pfam     | PF00046             | Homeodomain                | 28                       | 88                      |
|              | HaWOX2  | PANTHER  | PTHR45940:SF2       | PROTEIN WUSCHEL            | 38                       | 340                     |
|              | HaWOX2  | Pfam     | PF00046             | Homeodomain                | 69                       | 129                     |
|              | HaWOX3  | PANTHER  | PTHR45940:SF13      | WUSCHEL-RELATED HOMEOBX 1  | 66                       | 347                     |
|              | HaWOX3  | Pfam     | PF00046             | Homeodomain                | 83                       | 142                     |
|              | HaWOX4  | PANTHER  | PTHR47716           | -                          | 8                        | 238                     |
|              | HaWOX4  | Pfam     | PF00046             | Homeodomain                | 110                      | 169                     |
|              | HaWOX5  | PANTHER  | PTHR45940:SF6       | WUSCHEL-RELATED HOMEOBX 2  | 12                       | 240                     |
|              | HaWOX5  | Pfam     | PF00046             | Homeodomain                | 27                       | 85                      |
|              | HaWOX6  | PANTHER  | PTHR45940:SF3       | WUSCHEL-RELATED HOMEOBX 7  | 30                       | 210                     |
|              | HaWOX6  | Pfam     | PF00046             | Homeodomain                | 54                       | 114                     |
|              | HaWOX7  | PANTHER  | PTHR47716           | -                          | 6                        | 239                     |
|              | HaWOX7  | Pfam     | PF00046             | Homeodomain                | 109                      | 168                     |
|              | HaWOX8  | PANTHER  | PTHR45940:SF6       | WUSCHEL-RELATED HOMEOBX 2  | 10                       | 225                     |
|              | HaWOX8  | Pfam     | PF00046             | Homeodomain                | 26                       | 85                      |
|              | HaWOX9  | PANTHER  | PTHR45940:SF4       | WUSCHEL-RELATED HOMEOBX 3  | 17                       | 178                     |
|              | HaWOX9  | Pfam     | PF00046             | Homeodomain                | 19                       | 78                      |
|              | HaWOX10 | PANTHER  | PTHR45940:SF4       | WUSCHEL-RELATED HOMEOBX 3  | 47                       | 207                     |
|              | HaWOX10 | Pfam     | PF00046             | Homeodomain                | 50                       | 109                     |
|              | HaWOX11 | PANTHER  | PTHR45940:SF4       | WUSCHEL-RELATED HOMEOBX 3  | 11                       | 177                     |
|              | HaWOX11 | Pfam     | PF00046             | Homeodomain                | 15                       | 73                      |
| Intermediate | HaWOX12 | PANTHER  | PTHR47288:SF1       | WUSCHEL-RELATED HOMEOBX 9  | 1                        | 376                     |
|              | HaWOX12 | Pfam     | PF00046             | Homeodomain                | 49                       | 109                     |
|              | HaWOX13 | PANTHER  | PTHR47288:SF1       | WUSCHEL-RELATED HOMEOBX 9  | 1                        | 376                     |
|              | HaWOX13 | Pfam     | PF00046             | Homeodomain                | 58                       | 118                     |
|              | HaWOX14 | PANTHER  | PTHR47288:SF1       | WUSCHEL-RELATED HOMEOBX 9  | 1                        | 375                     |
|              | HaWOX14 | Pfam     | PF00046             | Homeodomain                | 50                       | 109                     |
| Ancient      | HaWOX15 | PANTHER  | PTHR46777:SF4       | WUSCHEL-RELATED HOMEOBX 13 | 4                        | 238                     |



|  |         |         |               |                                |    |     |
|--|---------|---------|---------------|--------------------------------|----|-----|
|  | HaWOX15 | Pfam    | PF00046       | Homeodomain                    | 72 | 132 |
|  | HaWOX16 | PANTHER | PTHR46777:SF4 | WUSCHEL-RELATED HOMEODOMAIN 13 | 4  | 204 |
|  | HaWOX16 | Pfam    | PF00046       | Homeodomain                    | 72 | 132 |
|  | HaWOX17 | PANTHER | PTHR46777:SF4 | WUSCHEL-RELATED HOMEODOMAIN 13 | 3  | 249 |
|  | HaWOX17 | Pfam    | PF00046       | Homeodomain                    | 79 | 139 |
|  | HaWOX18 | PANTHER | PTHR46777:SF4 | WUSCHEL-RELATED HOMEODOMAIN 13 | 3  | 243 |
|  | HaWOX18 | Pfam    | PF00046       | Homeodomain                    | 79 | 139 |

**Table S4.** List of Pfam and PANTHER accession for each HaWOX subdivided per clade.

| <b>A</b> |                  | <b>B</b> |              |
|----------|------------------|----------|--------------|
| AtWOX6   | <b>TLNLFPVR</b>  | AtWUS    | <b>LELRL</b> |
| HaWOX10  | <b>TLQLFPTT</b>  | HaWOX1   | <b>LELSL</b> |
| HaWOX11  | <b>TLQLFPLT</b>  | HaWOX2   | <b>LELSL</b> |
| HaWOX9   | <b>TLQLFPLT</b>  |          | ● ● ● ●      |
| HaWOX3   | <b>TLELFPVN</b>  |          |              |
| HaWOX6   | <b>TLQLFPVN</b>  |          |              |
| AtWOX5   | <b>TLQLFPVN</b>  |          |              |
| AtWUS    | <b>TLPLFPMH</b>  |          |              |
| HaWOX1   | <b>TLPLFPIH</b>  |          |              |
| HaWOX2   | <b>TLPLFPIP</b>  |          |              |
| AtWOX2   | <b>TLPLFPLQ</b>  |          |              |
| AtWOX3   | <b>TLELFPIS</b>  |          |              |
| AtWOX1   | <b>TLELFPILR</b> |          |              |
| HaWOX8   | <b>TLDLFPMH</b>  |          |              |
| HaWOX7   | <b>TLELFPILH</b> |          |              |
| HaWOX4   | <b>TLELFPILH</b> |          |              |
| AtWOX4   | <b>TLELFPILH</b> |          |              |
| HaWOX5   | <b>TLDLFPILH</b> |          |              |
|          | ● ● ● ● ●        |          |              |

**Figure S1.** Sequence analysis of WUS-box motif: TLXLFPXX (**A**) and EAR motif: LXLXL or LELXL (**B**) in WOX proteins from *H. annuus* (Ha) and *A. thaliana* (At). Bold characters and red dots evidence completely conserved amino acid residues.

| Protein | Sequence                                                      | Position |
|---------|---------------------------------------------------------------|----------|
| HaWOX3  | MWMMGYNPEHDHMNIINMVESYTTNGTRKLRPLVPRPPPTCAATSSSSSYNRFH----    | 56       |
| HaWOX1  | -----                                                         | 0        |
| HaWOX2  | MCH-----L-----PLY-KPSLHTTFTHAPFPFSFFIFLFIQS                   | 32       |
| HaWOX3  | L-----LPINHHLA--AEQNKREFNSQQMVVSSRWNPTEQIQLTLEELY-RRGTRT      | 105      |
| HaWOX1  | -----METQQQQADIQDFGNKNSNTYACRQSSTRWTPTSDQIRILKELYNNNGIRS      | 51       |
| HaWOX2  | LTSKQTNKQTTMDNNQPQDQDLGNKTNNSYLCRQSTTRWTPTSDQIRILKELYNNNGIRS  | 92       |
|         | ::: : :: *: :*:** :*: :*:** ..* :                             |          |
| HaWOX3  | PSAEEIQHITAQLRRYGKIEGKNVFYWFQNHKARERQKRRRQLDNPakELLHQ-PPFQLT  | 164      |
| HaWOX1  | PTADQIQRIAAQLRQYGKIEGKNVFYWFQNHKARERQKRRFTPTAPPPPSHFSHDIN---  | 108      |
| HaWOX2  | PTADQIQRIAAARLRHYGKIEGKNVFYWFQNHKARERQKRRFTPPAPPPPPPTLPPSNNTT | 152      |
|         | *:*:*:*:*:*:*:*:*:*:*:*:*:*:*:*:*:*:*:*:*:*:*                 |          |
| HaWOX3  | TDINIILNLDQSIQRKDSEVEETRNIWAIPTLSEKSMRL-----ERTKKAADegWRPAEQ  | 218      |
| HaWOX1  | -----HHLpNAAPMQIPSHHHHHYHHQEPPhVYAHpHKLYTTHHI-----            | 147      |
| HaWOX2  | TTMLTSPFS-----DHHHHHHQHMQIQSHHLPYFYN-----NQPVKLHATHHISP---    | 197      |
|         | . . * : . : * : .                                             |          |
| HaWOX3  | QEEEEEGEEGNDQLLL-LHRRRKSIpARNATWSHMMQCLSSSSPTNHITLVNNNNNSNTT  | 277      |
| HaWOX1  | -----GVGSSSQGVMGVGCGYGSVAME----KSFRKCSI--SPGESKATGGI-GRNIG    | 194      |
| HaWOX2  | ---SEGGSSSSQAFLPVGCsYGAITME----KSFRDCSI--SP-GEYTVSGGE-IRNLG   | 246      |
|         | * ...* .: : :: . . : .* ** .. . . *                           |          |
| HaWOX3  | TTTTVT-----SKTTPSL---V-----VSSHDDVDsYETLELFPVNRTVDHGREQ-P     | 322      |
| HaWOX1  | SRSRISVDSCSFFDTIKPKTYEMFENRDQDEEQGEpSTEIETLPLFPiHDG-----N     | 246      |
| HaWOX2  | SWVEVDS-----SCLDKMKSENETEDGGLSTDIETLPLFPiPGGSTTTTASGS         | 295      |
|         | : : . . .. : . *** **:                                        |          |
| HaWOX3  | EKCFLQTSdVT-----LNPRQFIEFLPLKN                                | 347      |
| HaWOX1  | HHDFFGMRtANLPLEQGTGGYYTGGSWYRSDeRASLELSLNSYGYN-----           | 293      |
| HaWOX2  | QHDFFKMKEA-LSSEHSNGGLYTDVNWYHSDGRtsLELSLNSYGYDSC----          | 343      |
|         | :*:* ** ::                                                    |          |

**Figure S2.** Amino acid sequences of three WOX transcription factors of *Helianthus annuus* (HaWOX). The putative acidic motifs are highlighted in magenta.

| <b>MEME motifs</b> | <b>Consensus sequences</b>                          |
|--------------------|-----------------------------------------------------|
| Red                | ILERLYRQGLRTPADQIQEITARLSQYGKIEGKNVFYWFQNHKARERQK   |
| Pale blue          | MFVKVMTDEQMEVLRKQIAIYATICZQLVDLHKSLTSNHDLAGVRLGNIY  |
| Pale green         | KFSGGTRWNPTPEQIQ                                    |
| Purple             | AVDDDNICFQNPVGSVDQRAKKVEPVFSPDASSKP                 |
| Yellow             | FEVAVGPFNVKEAFGDDAVLIDSSGQTVVTNEWGVTLQSLQHGAFFYYLVR |
| Dark green         | NNGESEVETLELFPLPPTN                                 |
| Blue               | GSMLANPRMDRIIGKMEVPGSYQSYMQGD                       |
| Fuchsia            | MASSNRHWPSMFKSKPTYTTRQDHWHS                         |

**Table S5.** Amino acid motifs consensus sequences as retrieved by MEME for HaWOX family.

>HaWOX1 (XP\_022006965.1)  
METQQQQADIQDFGNKNSNTYACRQSSTRWTPSDQIRILKELYNNNGIRSPTADQIQRIAAQLRQYGKIEGKNVIFYWFQNHKARERQKKRFTPTAPPPSHFSDHINHHLNPAAPMQIPSHHHHYHHQEPHVVYAHPHKLYTTHHISVGSSSQGVMGVGCGYGSVAMEKSF RKCSISPPGESKATGGIGRNIGSRSRISVDSCSFDDTIKPKTYEMFENRDQDEEQGEPSTEIETLPLFPPIHDGNHHDFFGMRTANLPLEQGTGGYYTGGSWYRSDERASLELSLNSYGYYN

>HaWOX2 (XP\_022018228.1)  
MCHLPLYKPSLHTTFTTHAPFPFSFFIFLFIQSLTSKQTNKQTTMDNNQPQDQDLGNKTNNSYLCRQSTTRWTPTSDQIRILKELYNNNGIRSPTADQIQRIAAARLRHYGKIEGKNVIFYWFQNHKARERQKKRFTPPAPPPPPPPTLPPSNTTTTMLTSPFSDHHHHHHQHMQIQSHHLPYFYNNQPVKLHATHHISPSEGGGSSSSQAFLPVGCSYGAITMEKSF RDCSISPGEYTVSGGEIRNLGSWVEVDSSCLDKMKSENATEDGGELSTDIE TLPLFPPIGGSTTTTASGSQHDFFKMKEALSSEHSNGGLYTDVNWYHSDGRTSLELSLNSYGYDSC

>HaWOX3 (XP\_021998889.1)  
MWMMGYNEPHEDHMNINMVESYTTNGTRKLRPLVPRPPPPTCAATSSSSYNRFHEHLLPINHHIAAEQNKREFNSQQMVVVSSRWNPTEQLQTLLELYRRGTRTPSAEEIQHITAQLRRYGKIEGKNVIFYWFQNHKARERQKRRRQLDNPakellHQPFFQLTTDINILNLDQSIQRKDEVEETRNWAIPTLS EKSM LRERTKKAADEGWRPAEQQQEEEEEGEENDQLLLLHRRRKSIPARNATWSHMMQCLSSSSPTNHITLVNNNNNSNTTTTTTVTTSKTTPSLVVSSHDDVDSYETLELFPVNRVTVDHGREQPEKCFLQTS DVTLNPRQFIEFLPLKN

>HaWOX4 (XP\_022017513.1)  
MFLTIRGMKVHQFTRAGGFWDDESLSCGLTLGLCKRFSPLNPKLTSSHSTETCVTMNDISGSNSSSSSSHVTAAFDLRSFIRPESCPTDQLVSSDHKKDSPQDETHPGGTRWNPTQEIQIGILEMFYKGGMRTPNAQQIEQITAKLSKYGKIEGKNVIFYWFQNHKARERQKQKRNNLGLNHSRSTPSSTMIN SISLNPTEGEVVE SPYKKCRSWSFECLEKDEEDDKTLELFP LHPEGRSRSS

>HaWOX5 (XP\_022040761.1)  
MEANSSKETIITVAGKETTTAAPTPCRWNPTKEQIDMLENLYKQGVRTPTADQIQEITTKLQTFGHIEGKNVIFYWFQNHKARQKQKQKQDHLSYFHQYYLHHNHHHPAVPPGIYPVPHHPNVLYGQCYIPQRDIGFYNQYPKMLLPSATTTKRRSPRTTTRTKASFGAGTIAGGNMIKSKMVNGKNYNHQETL DLFPLHPTGILQQKEANANNVNVCDSNACTSGPSVRSQDQHFFDFFSI

>HaWOX6 (XP\_022007144.1)  
MHQHVRCIFSVQKQQLITHKKTQFRNLNMDEGMSGFGLKPSRSTSTGAAGSKCGRWNPTNEQVKVLTDLFRSGLRTPSTDQIQKISSQLSFYGKIESKNVIFYWFQNHKARERQKRRRVYVENDQNDVTHVTKHLVEVESGRVIETLQLFPVNTLAFSDQSEKTKVYTNDHECKENTSPYTTVYTCGTEMENNYQQRHPSLDLRLSFM

>HaWOX7 (XP\_021983563.1)  
MGLSSMKVHQFTRGGGFWRDDESSSGLTLGAFKMRPLNPKLTSSGSTETCLTMNNNISVSNSSSSSSHVTAAFDLRSFIRPESSPIQLVSPDHKKDSPQVETHPGGTRWNPTQEIQIGILEMLYRGGM RTPNAQQIEQITSQLSKYGKIEGKNVIFYWFQNHKARERQKQKRNNLGLTHSPRSIPSSSTMIN SIPSNPTEGEVVE SPYKKCRSWSFECLEKDEEEDDHKTLELFP LHPEGR

>HaWOX8 (XP\_022040174.1)  
MDGCSGTSEVPAMVVGGAAGTPAASRWNPTEQIDMLENLYRQGLRTPADQIQEITGRLQTYGHIEGKNVIFYWFQNHKARQKQKEKQDHLSLFRQYNHHHRHLHQPFFVHI PPPNVVYEPCYIQQHN VGIFYVPQAVSPNTTTSSSLNRRSPRSAPSSAGFVLMHQPEIAVAVAGGSSSNIINIEQEDIATRKNNSRQETL DLFPMHPTGILQEPVDTTSNGGCHASRA CLIYVRILYVVDYVELCILLDD

>HaWOX9 (XP\_022033204.1)

MTSVPVRAPTRGGGGGGGSRWCPTPEQVMMLEGMYRGGLKTPTATQIQQITARLSIYGKIQGKNVIFYWFO  
NHKARDRQKL RKKLMVLYQQHRLYPHTHHHPFLPLH VAGVEDSSECKPSMNNWKVDIPSDSTCKLTCDCS  
LMTMMTMDHYATTPYCTRLP PKTLQLFPLTTMDLKEADDLSTTSKP

>HaWOX10 (XP\_021975839.1)

MQTEGDDNITKSPFINTPSLRDPLRSNLINRKM SATRLSNSGSGGSRWCPTPEQVMMLEGMYRGGL  
KTPTASQIQQITARLSLYGKIQGKNVIFYWFQNHKARDRQKV RKKLLAMYQHQRLLTSYNPCYHPFPI D  
GAVVEDNISSSKNMVNEWNVDDQTSCKKVMCDCSFMTVMMESTSPYCTRVP PKTLQLFPTTPAQTLP  
SQPK

>HaWOX11 (XP\_022006821.1)

MTSVPVPVTTSGGGRWCPTPEQVMMLEGMYRGGLKTPTATQIQQIVSRLSVYGKIQGKNVIFYWFQNHKAR  
DRQKL RKKLMALYQQHRLYPPTQDHPFLPLH PVGGVEDVSNNKPMNNWKVDLPSEHQPCKLMDCCPLMT  
MMLMEHHGRTTHSSRI PPKTLQLFPLTTTDLKQDDEPTTSKP

>HaWOX12 (XP\_022017615.1)

MASSNRHWPSMFKSKPTYTTHQDHQWHSSATNRSSPYTSGCEERTPEPKPRWNPKEQIRILESIFNSGL  
VNPPRDEIRRIRARLQ EYGQVGDANVIFYWFQNRKSRSKHKN RHLQKPQSHQSRTDYAVTSKAVTTSSSS  
DDKSSSKSIEFFLNSPTMSVNQQPHTYLGAGGSGSSSSNHQHGEFFQEPFFSPVVQQTQAPTASSFT  
QGFCFSELGTMIDQGNQHGNDGQKIVSSSGMLLTDLMMNHQYGI PSKNCGAKGVEEDNI IKMLSHSTPPP  
AQLAAPTLLVPPSTSTTIAPSTISDI GVEEAAGTGKAI VFINDVPFEVAVGQFNVKEAFGGDAMLIDSS  
GQTVLTNEWGVTLQSLQHGHSFYLLVRSFTYDHAGTVDLI

>HaWOX13 (XP\_021995064.1)

MASSNRHWPSMFKSKPTCNTRHHHQWHSNDSNTLLSSASPCRSPYTS GCEERSPEPKPRWNPKEQIRI  
LESIFNSGMVNPPREEIRKIRAQLQ EYGQVGDANVIFYWFQNRKSRSKHKT RNLOKSQNHLSPTTTKVTP  
SSSSSSEKSYSKSIDFLLNSPTASVNQHFCGGGVGGGFHHHLTEFSQEOPFCFPAVQQPQPVTDVATT  
TVGFTGFCFSEFGNVVSHGHNQGNVIEAVESGSGMLLTDLLMMNQSVIQKMND SKCVDEKTVKASSYN  
YTAPLPPTS AVPNPTTTT VASTICDI GVVPEMPAGKSTVFINDVAFEVAVGPFNVREAFGDDAVLIHSY  
GQPVVTNEWGVTLQSLQHGAFYLLVRSFSYGQSSTIDLI

>HaWOX14 (XP\_022022624.1)

MASSNRHWPSMFKSKSTYTTPQDQWQSHGSNHRSSPYTSGCDQRNPEPKPRWNPKEQIGILESIFNSG  
LVNPPRDEIRRIRARLQ EYGQVGDANVIFYWFQNRKSRSKYKN RQLQKSQNHQSSPLYGGIMAAATTSSSS  
SSGKSSSKSVEFFLNSPTASVNQQPQACVGE GGNLSLQHGHGEFFQDSFLFPVVQKPVAPSAASFAQGF  
CFPEPGTMIDQVNHMND DHTVVSRCGMLPTDLMMNHQYGIQSKNSRGKDVEEENS IKMLSHNTTTTTTP  
LSPLAVPTLIVPPAPT TIVPSTLNDH GVEEAGRKSIVFVNDVPYEVDVGPFNIKEAFGDNVVLIDSSG  
QTVVTDEWGVTLQSLQHGAFYLLVRSSTYDHAGTVDNMF

>HaWOX15 (XP\_022015954.1)

MDQDDRNMFVKVMTDEQMEVLRKQIAIYATICQQLVDLHKS LTSNHDLAGVRLGNIYSDPLTTSGCHKFS  
GRQRWTPTPVQLQILERLFDQGN GTPSKQKIKEITSELSQH GQISETNVYNWFQNRRARSKRKQ QVSTTN  
NGESEVETEVE SPKPHQNSASAVDES NICFQNSNVGSADQRAKRVEPVCPSDASSKPNAGQISYYGTMLA  
NPRMDRIIGKIEAPGSYQSYMQGDH DRLSAKNQTRFS

>HaWOX16 (XP\_022015955.1)

MDQDDRNMFVKVMTDEQMEVLRKQIAIYATICQQLVDLHKS LTSNHDLAGVRLGNIYSDPLTTSGCHKFS  
GRQRWTPTPVQLQILERLFDQGN GTPSKQKIKEITSELSQH GQISETNVYNWFQNRRARSKRKQ QVSTTN  
NGESEVETEVE SPKPHQNSASAVDES NICFQNSNVGSADQRAKRVEPVCPSDASSKPNAGQISYYGTMLA  
NNYM

>HaWOX17 (XP\_022012271.1)

MEQDEGNNNNNNGGMFVKVMTDEQMEVLRKQIAIYATICEQLVDLHKS LTSNHDLAGVRLGNIYNDPLVT  
SGGHKFSGRQRWTPTPVQLQILERLFEQGN GTPSKQKIKEITSELSQH GQISETNVYNWFQNRRARSKRK

QQVSAPNNNGESEVETEVESEPKPQQNSTSTADDNMCFQNPACSVDRRAKKVEPVFSPDASSKPAGNVGQ  
MSYYGSMLSNFRMDRIIGKMEVPGSYQSYMQGDEYNMTG

>HaWOX18 (XP\_022012272.1)

MEQDEGNNNNNNNGGMFVKVMTDEQMEVLRKQIAIYATICEQLVDLHKSLTSHHDLAGVRLGNIYNDPLVT  
SGGHKFSGRQRWTPTPVQLQILERLFEQGNGTPSKQKIKEITSELSQHGGQISETNVYNWFQNRARRSKRK  
QQVSAPNNNGESEVETEVESEPKPQQNSTSTADDNMCFQNPACSVDRRAKKVEPVFSPDASSKPAGNVGQ  
MSYYGRMDRIIGKMEVPGSYQSYMQGDEYNMTG

**Figure S3.** Amino acidic sequences of the WOX transcription factor family of *Helianthus annuus* (HaWOX). The homeodomain HB is highlighted in yellow. The intron position is highlighted in red. Between brackets corresponding protein id from NCBI database.

| Clade | HaWOX Pairwise comparison | dS      | dN     | dN/dS  | Duplication event |
|-------|---------------------------|---------|--------|--------|-------------------|
| WUS   | HaWOX1 HaWOX2             | 1,1897  | 0,3176 | 0,267  | WGD               |
|       | HaWOX4 HaWOX7             | 0,6233  | 0,0841 | 0,1348 | WGD               |
|       | HaWOX5 HaWOX8             | 1,6011  | 0,4512 | 0,2818 | WGD               |
|       | HaWOX1 HaWOX3             | 54,9613 | 1,0841 | 0,0197 |                   |
|       | HaWOX1 HaWOX4             | 52,5691 | 1,8074 | 0,0344 |                   |
|       | HaWOX1 HaWOX5             | 53,0618 | 0,9234 | 0,0174 |                   |
|       | HaWOX1 HaWOX6             | 58,1724 | 0,7374 | 0,0127 |                   |
|       | HaWOX1 HaWOX7             | 50,3862 | 1,6729 | 0,0332 |                   |
|       | HaWOX1 HaWOX8             | 17,6915 | 1,0243 | 0,0579 |                   |
|       | HaWOX1 HaWOX9             | 53,0522 | 0,7716 | 0,0145 |                   |
|       | HaWOX1 HaWOX10            | 10,9451 | 0,8025 | 0,0733 |                   |
|       | HaWOX1 HaWOX11            | 54,2451 | 0,9985 | 0,0184 |                   |
|       | HaWOX2 HaWOX3             | 49,1504 | 1,2753 | 0,0259 |                   |
|       | HaWOX2 HaWOX4             | 7,288   | 0,8818 | 0,121  |                   |
|       | HaWOX2 HaWOX5             | 52,8214 | 0,9827 | 0,0186 |                   |
|       | HaWOX2 HaWOX6             | 57,7555 | 0,8548 | 0,0148 |                   |
|       | HaWOX2 HaWOX7             | 44,883  | 0,7674 | 0,0171 |                   |
|       | HaWOX2 HaWOX8             | 57,7625 | 0,8548 | 0,0148 |                   |
|       | HaWOX2 HaWOX9             | 55,3682 | 0,8526 | 0,0154 |                   |
|       | HaWOX2 HaWOX10            | 50,0957 | 0,9502 | 0,019  |                   |
|       | HaWOX2 HaWOX11            | 4,3512  | 1,0234 | 0,2352 |                   |
|       | HaWOX3 HaWOX4             | 4,4944  | 0,8311 | 0,1849 |                   |
|       | HaWOX3 HaWOX5             | 54,7529 | 1,0277 | 0,0188 |                   |
|       | HaWOX3 HaWOX6             | 7,935   | 0,9848 | 0,1241 |                   |
|       | HaWOX3 HaWOX7             | 52,5517 | 0,8037 | 0,0153 |                   |
|       | HaWOX3 HaWOX8             | 50,6578 | 0,9206 | 0,0182 |                   |
|       | HaWOX3 HaWOX9             | 52,1847 | 0,675  | 0,0129 |                   |
|       | HaWOX3 HaWOX10            | 23,4122 | 0,8832 | 0,0377 |                   |
|       | HaWOX3 HaWOX11            | 27,0204 | 0,8451 | 0,0313 |                   |
|       | HaWOX4 HaWOX5             | 50,4919 | 0,6831 | 0,0135 |                   |



|     |                 |         |        |        |     |
|-----|-----------------|---------|--------|--------|-----|
|     | HaWOX4 HaWOX6   | 26,4252 | 0,905  | 0,0342 |     |
|     | HaWOX4 HaWOX8   | 26,333  | 0,905  | 0,0344 |     |
|     | HaWOX4 HaWOX9   | 56,6917 | 0,5731 | 0,0101 |     |
|     | HaWOX4 HaWOX10  | 5,8006  | 0,7784 | 0,1342 |     |
|     | HaWOX4 HaWOX11  | 59,6387 | 0,6106 | 0,0102 |     |
|     | HaWOX5 HaWOX6   | 55,9531 | 0,9401 | 0,0168 |     |
|     | HaWOX5 HaWOX7   | 50,698  | 0,6674 | 0,0132 |     |
|     | HaWOX5 HaWOX9   | 49,4327 | 0,797  | 0,0161 |     |
|     | HaWOX5 HaWOX10  | 49,9498 | 0,8525 | 0,0171 |     |
|     | HaWOX5 HaWOX11  | 5,433   | 0,8452 | 0,1556 |     |
|     | HaWOX6 HaWOX7   | 6,2837  | 0,8397 | 0,1336 |     |
|     | HaWOX6 HaWOX8   | 3,1971  | 0,8588 | 0,2686 |     |
|     | HaWOX6 HaWOX9   | 59,6439 | 0,852  | 0,0143 |     |
|     | HaWOX6 HaWOX10  | 53,7752 | 1,0242 | 0,019  |     |
|     | HaWOX6 HaWOX11  | 4,9812  | 0,8558 | 0,1718 |     |
|     | HaWOX7 HaWOX8   | 50,6977 | 0,6673 | 0,0132 |     |
|     | HaWOX7 HaWOX9   | 49,4344 | 0,797  | 0,0161 |     |
|     | HaWOX7 HaWOX10  | 49,9501 | 0,8525 | 0,0171 |     |
|     | HaWOX7 HaWOX11  | 5,4331  | 0,8452 | 0,1556 |     |
|     | HaWOX8 HaWOX9   | 3,1492  | 0,6735 | 0,2139 |     |
|     | HaWOX8 HaWOX10  | 3,3278  | 0,8159 | 0,2452 |     |
|     | HaWOX8 HaWOX11  | 3,4997  | 0,6508 | 0,186  |     |
|     | HaWOX9 HaWOX10  | 1,264   | 0,335  | 0,2651 |     |
|     | HaWOX9 HaWOX11  | 0,419   | 0,1461 | 0,3487 |     |
|     | HaWOX10 HaWOX11 | 1,31    | 0,3162 | 0,2414 |     |
| INT | HaWOX12 HaWOX14 | 0,4869  | 0,148  | 0,3039 | WGD |
|     | HaWOX12 HaWOX13 | 1,0625  | 0,3124 | 0,294  |     |
|     | HaWOX13 HaWOX14 | 1,0333  | 0,2947 | 0,2852 |     |
| ANT | HaWOX15 HaWOX17 | 0,7581  | 0,0954 | 0,125  | WGD |
|     | HaWOX16 HaWOX17 | 0,7643  | 0,1011 | 0,1323 |     |
|     | HaWOX16 HaWOX18 | 0,8514  | 0,1081 | 0,1269 |     |
|     | HaWOX15 HaWOX18 | 0,7872  | 0,1149 | 0,1459 |     |

**Table S6.** Ratio between neutral mutation (dN) and purifying selection (dS) for each HaWOX combination divided per clade.

## Reference

[44] Badouin, H.; Gouzy, J.; Murat, F.; Staton, S.E.; Cottret, L.;... Langlade, N.B. The sunflower genome provides insights into oil metabolism, flowering and Asterid evolution. *Nature* **2017**, *546*, 148-152.
